# Supplementary material for: Boosting the water splitting activity of cobalt nitride through morphological design: a comparison of the influence of structure on the hydrogen and oxygen evolution reactions
Source: Royal Society of Chemistry journal article supplement (doi:10.1039/d1se00616a), 2021-01-01
Supplement: d1se00616a1.pdf [file d1se00616a1.pdf]

**Boosting the water splitting activity of cobalt nitride through the morphological design: a comparison for the influences of structures towards hydrogen and oxygen evolution reactions**

Tingting Liu <sup>a</sup>, Sheng Cai <sup>a</sup>, Zhiyuan Mei <sup>a</sup>, Genfu Zhao <sup>a</sup>, Lufu Xu <sup>a</sup>, Qi An <sup>a</sup>, Yao Fu <sup>a</sup>, Han Wang <sup>a</sup>, Mian Li <sup>b,\*</sup>, Hong Guo <sup>a,\*</sup>

<sup>a</sup> School of Materials Science and Engineering, Green Energy Key Laboratory of All-Solid Ion Battery in Yunnan Province University, Yunnan University, No. 2, Green Lake North Road, Kunming, 650091, China

<sup>b</sup> National and Local Joint Engineering Laboratory for Lithium-ion Batteries and Materials Preparation Technology, Key Laboratory of Advanced Battery Materials of Yunnan Province, Faculty of Metallurgical and Energy Engineering, Kunming University of Science and Technology, Kunming, 650093, China

**Corresponding author:**

E-mail addresses: [mianzi2009@126.com](mailto:mianzi2009@126.com) (M. Li), [guohongcom@126.com](mailto:guohongcom@126.com) (H. Guo).

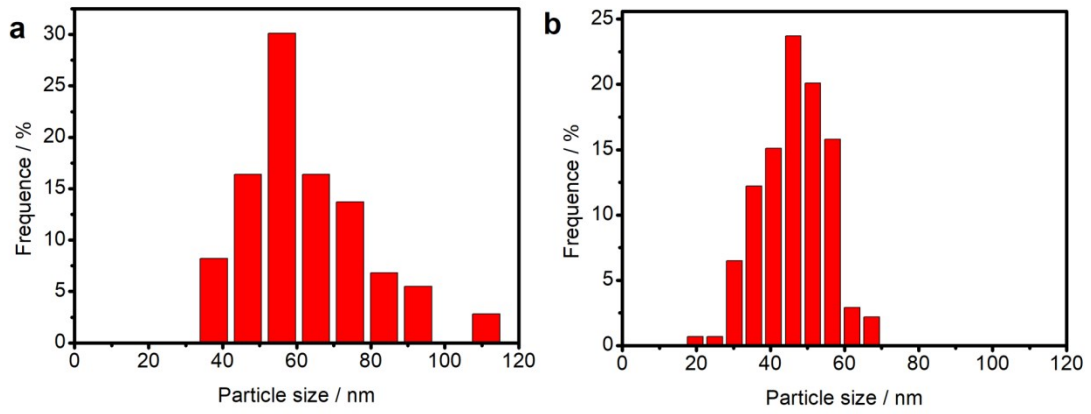

**Figure S1.** The histograms of the particle size distributions for the CoN-S (a) and CoN-F (b).

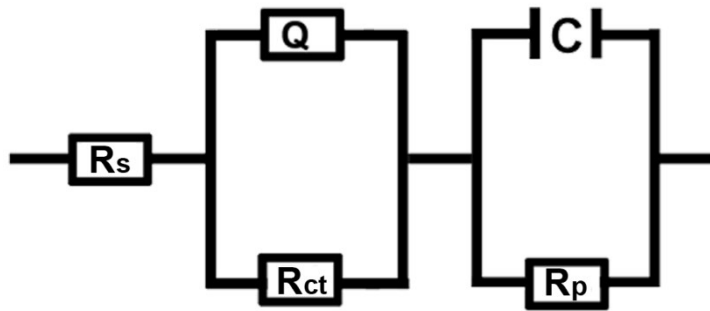

**Figure S2.** The equivalent circuit utilized for analyzing the HER EIS data for CoN-P, CoN-S and CoN-F.

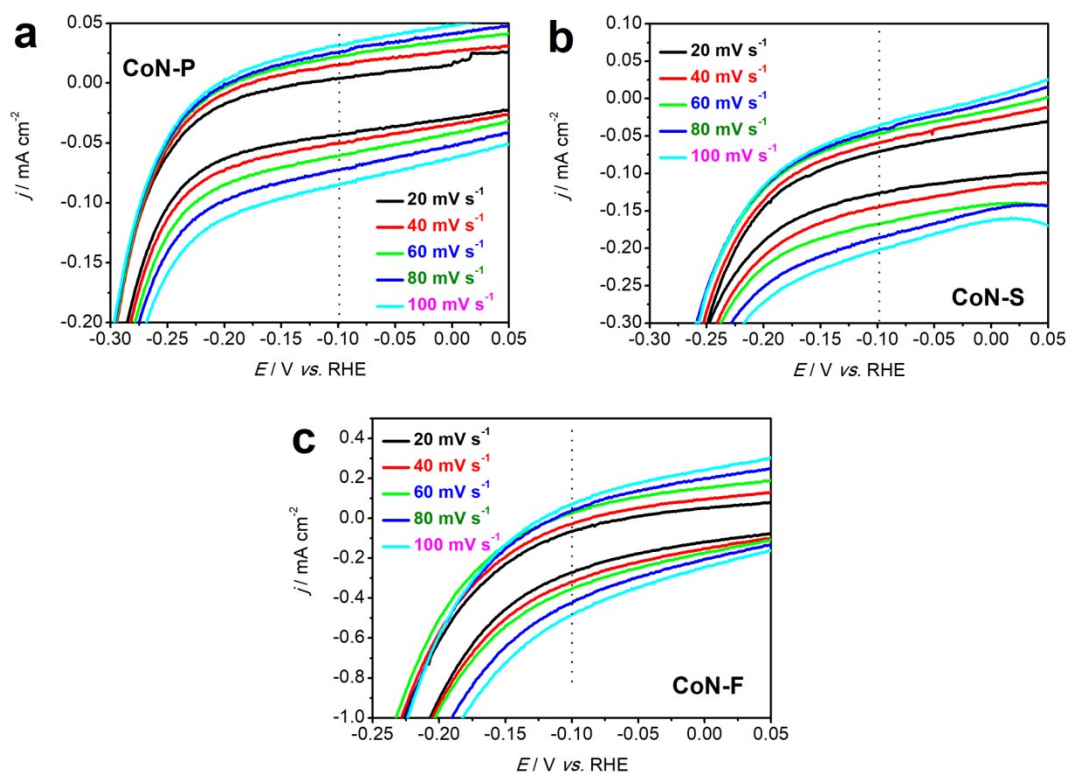

**Figure S3.** CV curves recorded at different scan rates from 20 to 100 mV s<sup>-1</sup> for CoN-P (a), CoN-S (b) and CoN-F (c).

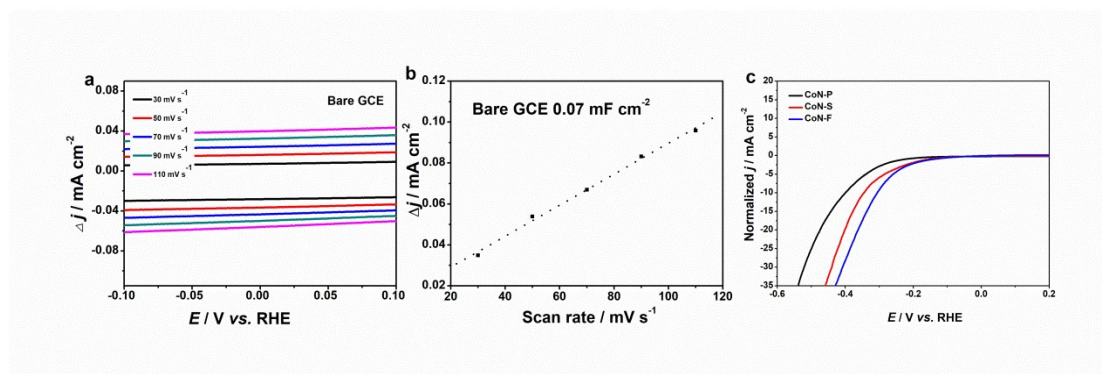

**Figure S4.** (a)  $C_{dl}$  tests of bare GCE by CV method: CV curves of bare GCE recorded at different scan rates of 30, 50, 70, 90, and 110 mV s<sup>-1</sup>; (b) Capacitive current densities as a function of scan rates recorded from **Figure S4a**; (c) HER LSV polarization curves for CoN-F, CoN-S and CoN-P in a 1.0 M KOH medium. The current densities of all catalysts have been normalized by electrochemically active surface area (ECSA).

**Table S1.** C, R and ECSA values for HER modified electrodes and bare RDE.

| Samples  | C (mF cm <sup>-2</sup> ) | R     | ECSA (cm <sup>2</sup> ) |
|----------|--------------------------|-------|-------------------------|
| Bare GCE | 0.07                     | —     | —                       |
| CoN-F    | 2.16                     | 30.85 | 6.05                    |
| CoN-S    | 0.71                     | 10.14 | 1.99                    |
| CoN-P    | 0.44                     | 6.28  | 1.23                    |

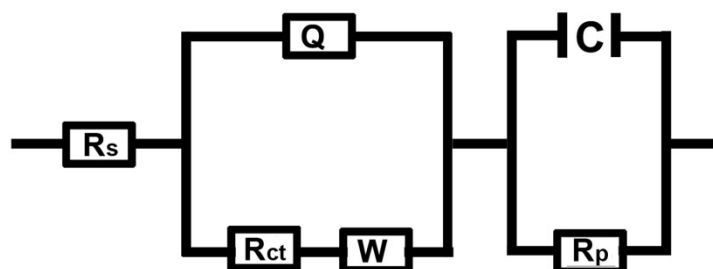

**Figure S5.** The equivalent circuit utilized for analyzing the OER EIS data for CoN-P, CoN-S and CoN-F.

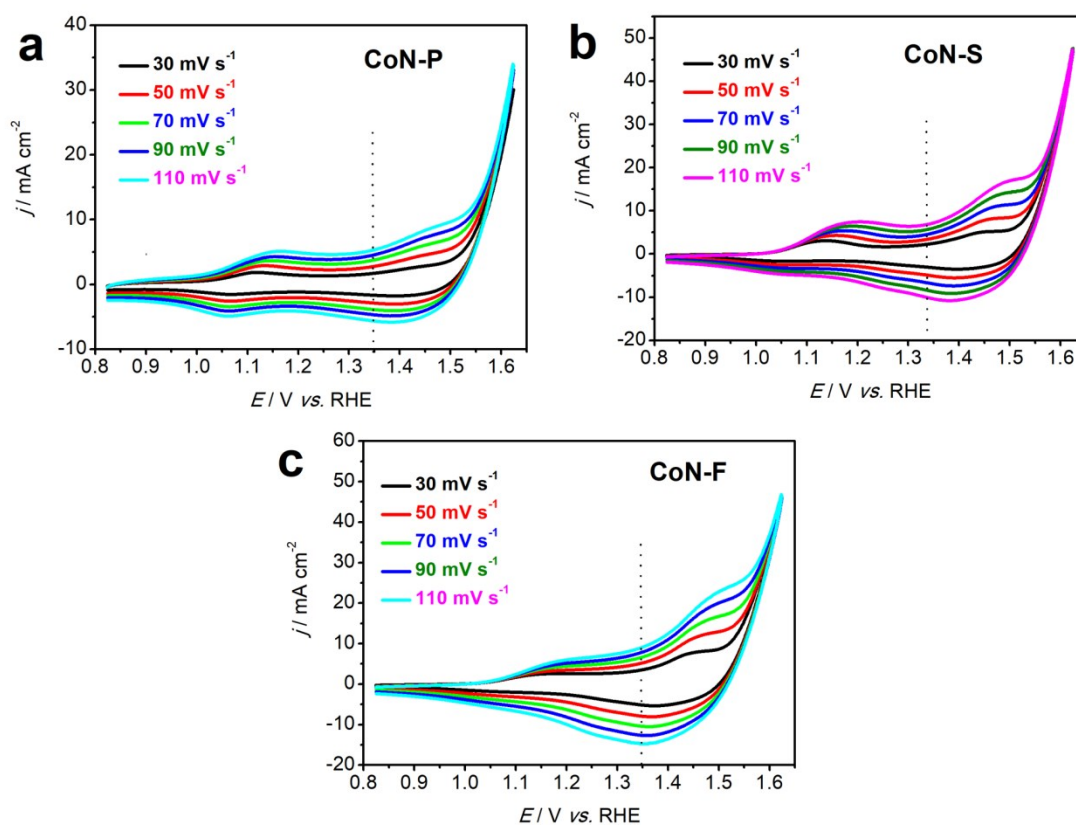

**Figure S6.** CV curves recorded at different scan rates from 30 to 110 mV s<sup>-1</sup> for CoN-P (a), CoN-S (b) and CoN-F (c).

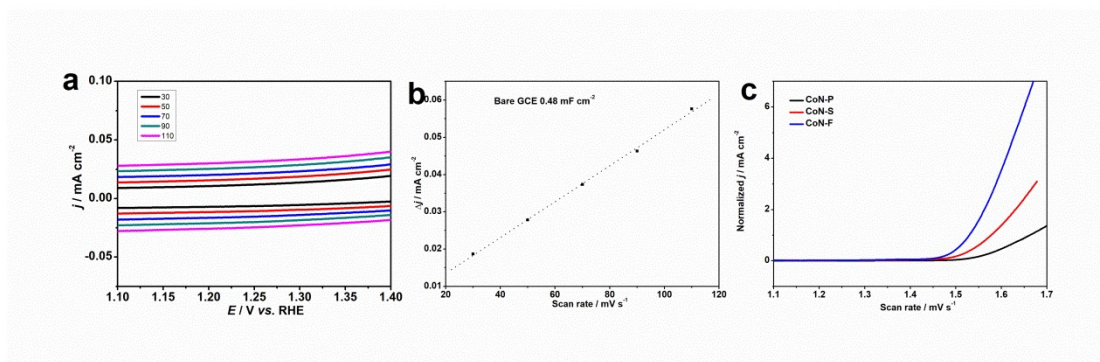

**Figure S7.** (a) OER  $C_{dl}$  tests of bare GCE by CV method: CV curves of bare GCE recorded at different scan rates of 30, 50, 70, 90, and 110  $\text{mV s}^{-1}$ ; (b) Capacitive current densities as a function of scan rates recorded from Figure SX(a); (c) OER LSV polarization curves for CoN-F, CoN-S and CoN-P in a 1.0 M KOH medium. The current densities of all catalysts have been normalized by electrochemically active surface area (ECSA).

**Table S2.** C, R and ECSA values for OER modified electrodes and bare RDE.

| Samples  | C ( $\text{mF cm}^{-2}$ ) | R      | ECSA ( $\text{cm}^2$ ) |
|----------|---------------------------|--------|------------------------|
| Bare GCE | 0.48                      | —      | —                      |
| CoN-F    | 94.87                     | 197.64 | 38.78                  |
| CoN-S    | 57.58                     | 119.96 | 23.54                  |
| CoN-P    | 44.05                     | 91.77  | 18.01                  |

**Table S3** Comparison of cell voltage to achieve a current density of 10  $\text{mA cm}^{-2}$  for CoN-F||CoN-F cell and other reported water splitting cells.

| Catalysts                                          | $E_{10}$ (V) | References                             |
|----------------------------------------------------|--------------|----------------------------------------|
| CoN-F  CoN-F                                       | 1.613        | This work                              |
| Pt/C  RuO <sub>2</sub>                             | 1.592        |                                        |
| Co <sub>4</sub> N@NC  Co <sub>4</sub> N@NC-700     | 1.561        | ACS Energy Lett. 2020, 5, 3, 692–700   |
| Co <sub>1-x</sub> S@CoN  Co <sub>1-x</sub> S@CoN   | 1.55         | Small 2020, 16, 2002432                |
| CoN@CC  CoN@CC                                     | 1.59         | Electrochim. Acta 2018, 273, 229-238   |
| Co <sub>3</sub> O <sub>4</sub> NWs/CC  CoP NWs/CC  | 1.63         | Mater. Chem. Front., 2018, 2, 323--330 |
| FeOOH@Co <sub>4</sub> N    FeOOH@Co <sub>4</sub> N | 1.59         | ACS Appl. Mater. Interfaces 2019, 11,  |

|                                                            |      |                                                     |
|------------------------------------------------------------|------|-----------------------------------------------------|
|                                                            |      | 5152–5158                                           |
| CoS <sub>2</sub> NS  CoS <sub>2</sub> NS                   | 1.58 | Mater. Chem. Front., 2018, 2, 1732--1738            |
| CoO-Co <sub>4</sub> N  CoO-Co <sub>4</sub> N               | 1.79 | J. Mater. Chem. A 2018, 6 (48), 24767-24772         |
| Co <sub>2</sub> P/CoN-NCNTs   Co <sub>2</sub> P/CoN-NCNTs  | 1.64 | Adv. Funct. Mater. 2018, 28, 1805641                |
| CoN@VON  CoN@VON                                           | 1.64 | Appl. Catal. B: Environ. 2019, 241, 521-527         |
| Co <sub>5.47</sub> N NP@N-PC  Co <sub>5.47</sub> N NP@N-PC | 1.62 | ACS Appl. Mater. Interfaces 2018, 10 (8), 7134-7144 |

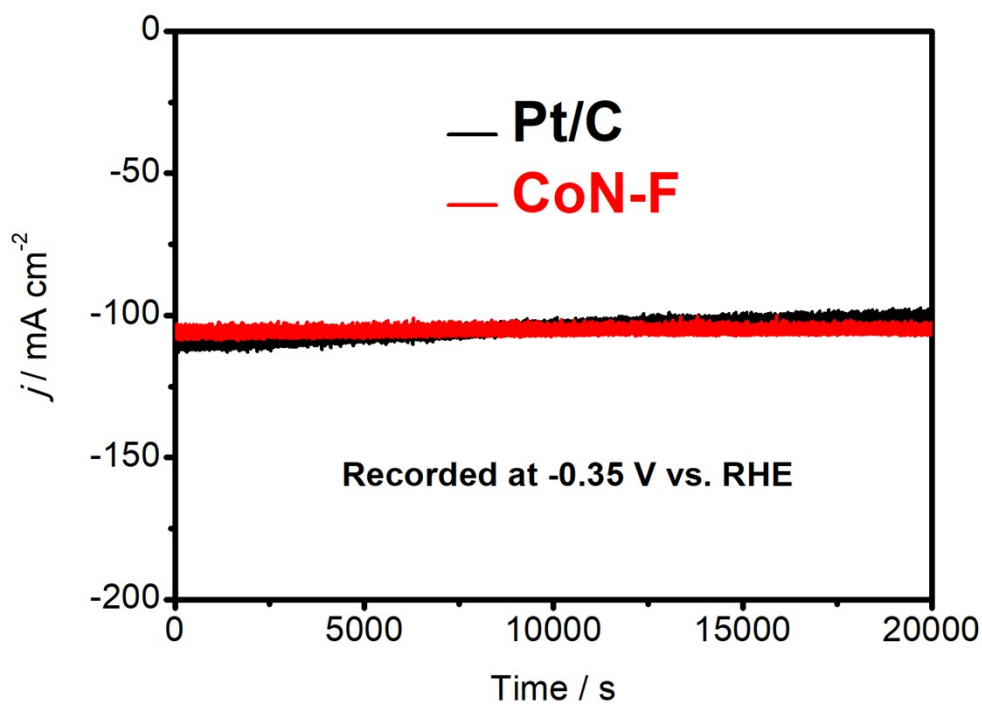

**Figure S8.** the raw data of chronoamperometry measurement in **Figure 5**.

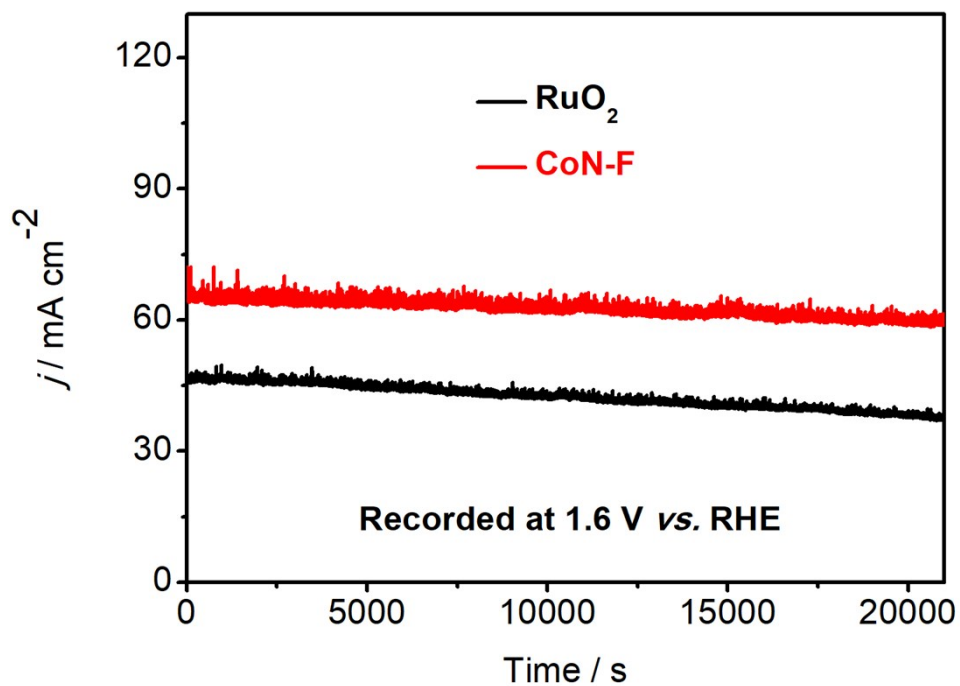

**Figure S9.** the raw data of chronoamperometry measurement in **Figure 6**.

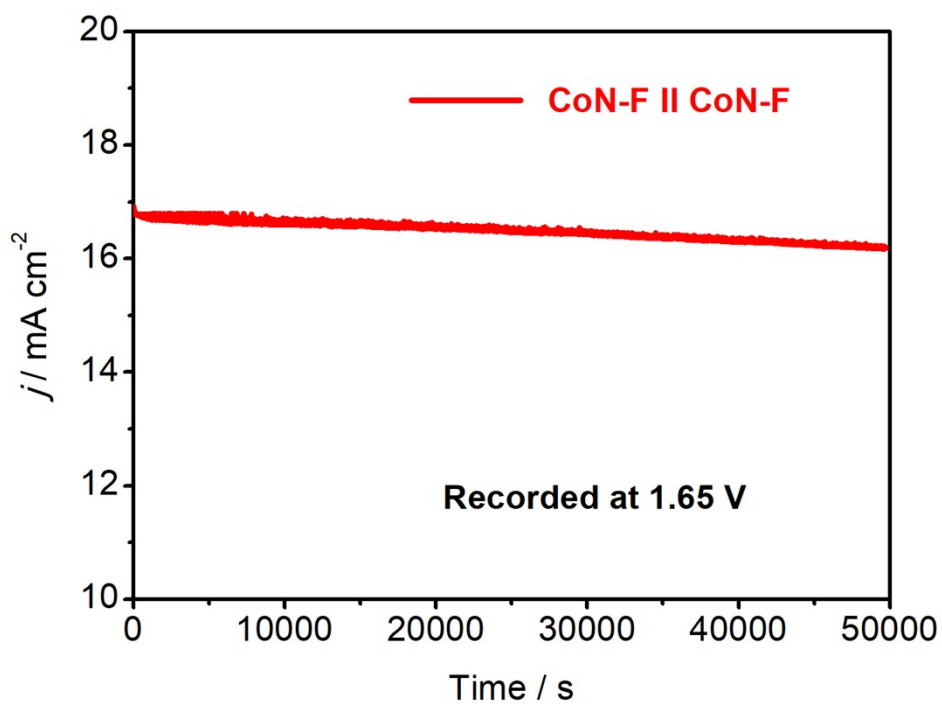

**Figure S10.** the raw data of chronoamperometry measurement in **Figure 7**.



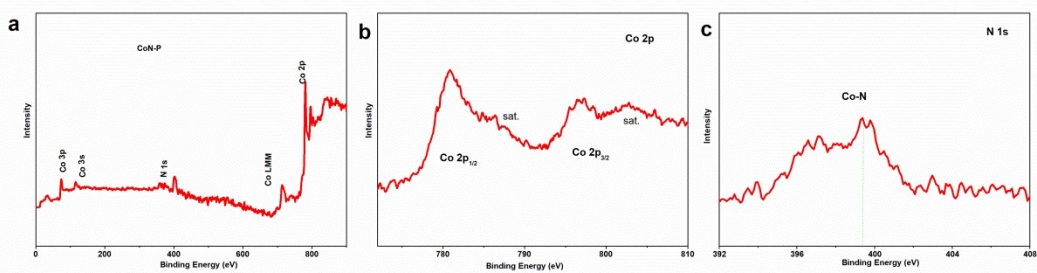

**Figure S11.** The XPS survey (a), Co 2p (b) and N 1s (c) spectra of CoN-P sample.

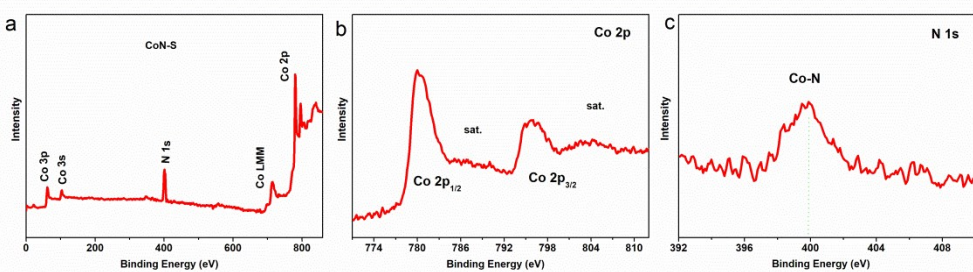

**Figure S12.** The XPS survey (a), Co 2p (b) and N 1s (c) spectra of CoN-S sample.

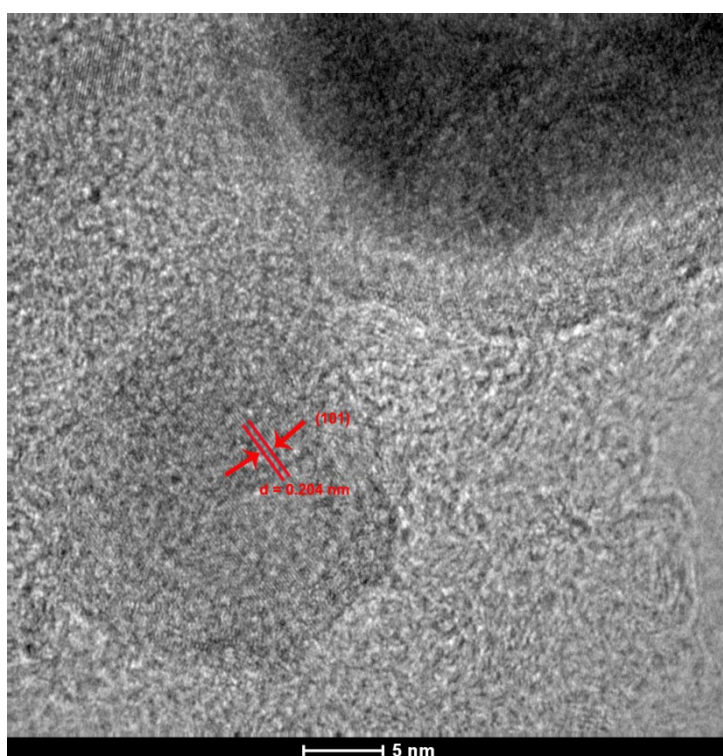



**Figure S13.** The high-resolution TEM image of 500 cycles CV tset for CoN-F.
